1  
2  
3  
4  
5  
6  
7  
8  
9  
10  
11  
12  
13  
14  
15  
16  
17  
18  
19  
20  
21  
22  
23  
24  
25  
26  
27  
28  
29  
30  
31  
32  
33  
34  
35

## Tissue self-organization based on collective cell migration by contact activation of locomotion and chemotaxis

Taihei Fujimori<sup>1</sup>, Akihiko Nakajima<sup>1,2</sup>, Nao Shimada<sup>1</sup> and Satoshi Sawai<sup>\*1,2</sup>

<sup>1</sup> Graduate School of Arts and Sciences, University of Tokyo, Komaba, Meguro-ku, Tokyo 153-8902, Japan.

<sup>2</sup> Research Center for Complex Systems Biology, University of Tokyo, Komaba, Meguro-ku, Tokyo 153-8902, Japan.

\*Correspondence to: [cssawai@mail.ecc.u-tokyo.ac.jp](mailto:cssawai@mail.ecc.u-tokyo.ac.jp)

### Abstract

Despite their central role in multicellular organization, navigation rules that dictate cell rearrangement remain much to be elucidated. Contact between neighboring cells and diffusive attractant molecules are two of the major determinants of tissue-level patterning, however in most cases, molecular and developmental complexity hinders one from decoding the exact governing rules of individual cell movement. A primordial example of tissue patterning by cell rearrangement is found in the social amoeba *Dictyostelium discoideum* where the organizing center or the ‘tip’ self-organize as a result of sorting of differentiating prestalk and prespore cells. Due to its relatively simple and conditional multicellularity, the system provides a rare case where the process can be fully dissected into individual cell behavior. By employing microfluidics and microsphere-based manipulation of navigational cues at the single-cell level, here we uncovered a previously overlooked mode of *Dictyostelium* cell migration that is strictly directed by cell-cell contact. The cell-cell contact signal is mediated by E-set Ig-like domain containing heterophilic adhesion molecules TgrB1/TgrC1 that act in trans to induce plasma membrane recruitment of SCAR complex and formation of dendritic actin networks, and the resulting cell protrusion competes with those induced by chemoattractant cAMP. Furthermore, we demonstrate that both prestalk and prespore cells can protrude towards the contact signal as well as to chemotax towards cAMP, however when given both signals, prestalk cells orient towards the chemoattractant whereas prespore cells choose the contact signal. These data suggest a new model of cell sorting by competing juxtacrine and diffusive cues each with potential to drive its own mode of collective cell migration. The present findings not only resolve the long standing question of how cells sort in *Dictyostelium* but also cast light on the remarkable parallels in collective cell migration that evolved independently in metazoa and amoebozoa.

1

## 2 **Introduction**

3 One of the fundamental processes that underlie tissue patterning is spatial rearrangement and  
4 repositioning of cells according to their cell-types [1-3]. *In vitro* studies have demonstrated wide  
5 occurrence of cell-type dependent segregation in the mixture of cells dissociated from different tissues  
6 [4-6]. Such cell segregation has traditionally been explained based on differences in cell-cell adhesion  
7 force and surface tension in analogy to phase separation e.g. of oil and water where membrane  
8 fluctuations would drive rearrangement of relative positions of cells so as to minimize total free energy.  
9 Quantitative measurements in conjunction with mathematical modeling have successfully provided  
10 qualitatively accurate predictions of *in vitro* sorting patterns [7,8]. While such view of cell  
11 segregation does seem to hold for *in vitro* systems, the extent of their contribution *in vivo* remains to  
12 be questioned. In many cases, such a stochastically driven process appear not to hold, as cells are  
13 migratory[9,10], and segregation occurs rapidly without being trapped in metastable states. In  
14 primitive streak of chick embryo and limb bud, directed migration is the primary driving force of  
15 morphogenesis[11,12]. In zebrafish gastrulation, internalization of mesendoderm cells require Rac  
16 dependent directed cell migration [9]. These examples point to importance of specific directional  
17 cues and migration in cell segregation, however the exact navigational rules at the single-cell level and  
18 their linkage to the resulting tissue patterns are still largely undeciphered.

19 In the social amoeba *Dictyostelium discoideum*, upwards of 100,000 cells aggregate by chemotaxis  
20 to self-generated waves of extracellular cAMP[13-17] to form a multicellular mound. In the mound,  
21 cells differentiate into either prespore or prestalk cells that initially appear at random positions before  
22 being segregated to form a distinct prestalk tip region[3,18,19] – an organizing center that sits on top  
23 of a prespore cell mass (Fig. 1A). During this process, cAMP waves cease (Fig. S1A and B), prespore  
24 cells migrate radially while prestalk cells exhibit a combination of radial and centripetal movement  
25 toward the apical region (Fig. 1B). Several lines of evidence suggest importance of chemotaxis to  
26 extracellular cAMP in cell segregation [20-22]. A gradient of extracellular cAMP formed by a glass  
27 needle in a mound can direct prestalk cell migration [22], and over-expression of cAMP-specific  
28 phosphodiesterase (PDE) suppresses tip formation [20]. On the other hand, heterophilic adhesion  
29 molecules TgrB1 and TgrC1 [23,24] are also essential for tip formation [25]. Knock-out mutant of  
30 TgrC1 exhibits motility defects [26] as well as loss of developmental gene expression[25,27].  
31 Moreover, application of antibody against TgrC1 to regenerating mounds suppresses prestalk/prespore  
32 segregation [28]. TgrB1 and TgrC1 are also known for their polymorphism, which results in kin  
33 discriminatory segregation during aggregation [24,29,30]. These lines of evidence suggest requirement  
34 for extracellular cAMP and TgrB1/C1 for tip formation, however how they dictate the cell segregation  
35 process remains to be resolved [3,31].

36

37

## 1 **Results**

2 **Navigational cues for *Dictyostelium* cell migration.** To study how cell migration are being directed  
3 in the mound, we analyzed the effect of interfering with extracellular cAMP and TgrB1/C1. In order  
4 to circumvent developmental effects due to requirement of TgrB1/C1 on cell differentiation[25], we  
5 took advantage of the fact that the process is entirely self-organizing; i.e. it can be recapitulated by  
6 fully differentiated prestalk and prespore cells after dissociation[32]. Dissociated cells immediately  
7 began emitting cAMP waves, reaggregated and formed tips as cAMP waves ceased (Fig. 1C-E; Movie  
8 S1). When regenerating mounds were immersed in purified TgrB1<sup>ext</sup> (Fig. S1C-F), cAMP wave  
9 propagation did not stop, and cells moved in highly-coordinated scrolling motion at least for the  
10 duration of our observation (Fig. 1F,G). Prestalk and prespore cells moved similarly and did not  
11 segregate (Fig. 1C, +TgrB1<sup>ext</sup>; Movie S1). When exposed to cAMP-specific phosphodiesterase  
12 (PDE) to attenuate extracellular cAMP, mounds became spherical, and the cells continued to migrate  
13 radially as the entire cell mass moved like a rolling ball (Fig. 1C, +PDE; Movie S1). Prestalk cells  
14 sorted out to the periphery but never collected to form the apical tip (Fig. 1C, +PDE; Fig. S1G). The  
15 rotational movement was not correlated with a few passages of residual waves (Fig. 1H,I) suggesting  
16 that cell migration, despite being highly coordinated, was not chemotactically oriented. When both  
17 purified TgrB1<sup>ext</sup> and PDE were applied, prestalk cells were completely stalled while prespore cells  
18 retained some movement but were less coordinated (Fig. 1C, +TgrB1<sup>ext</sup>/+PDE; Movie S1). These  
19 observations indicate that, in addition to chemotaxis towards cAMP, there is an additional guidance  
20 cue mediated by cell-cell contact that directs collective cell movement.

21 To clarify the basic rule of cell movement, we analyzed migration of cells immediately prior  
22 to prestalk/prespore diversification ('streaming-stage' cells; see Methods) using a microfluidic  
23 gradient chamber (Fig. S2A,B). While moving towards the cAMP source, cells made head-to-tail  
24 contacts and formed trains (Fig. 2A; Movie S2). At low loading densities, most cell trains were short;  
25 many consisted of 2 cells (Fig. 2B). In both 2-cell and longer cell trains, leader cells formed lateral  
26 pseudopods and exerted exploratory trajectories similar to solitary migration, whereas those that  
27 followed were elongated, monopodal and moved ballistically (Fig. 2C; Fig. S2C-F, S3). To delineate  
28 the role of chemotaxis and cell-cell contact, response to a reorienting cAMP gradient was analyzed  
29 (Fig. S4). Within minutes after gradient reversal, solitary cells and leader cells changed their  
30 direction by extending *de novo* pseudopods (Fig. 2D, upper panels). While some follower cells also  
31 responded similarly, many exhibited no immediate response and continued to follow the cell in contact  
32 (Fig. 2D, lower panels; Fig. 2E; Movie S3). Given that the cells were treated here with adenylyl  
33 cyclase inhibitor SQ22536 [16,33] to suppress cAMP synthesis, these observations suggest that in  
34 addition to chemotaxis to cAMP required for the formation of cell streams[34], there may be an  
35 alternative mode of navigation that depends on cell-cell contact.

36

37 **F-actin dynamics at cell-cell contact sites.** Compared to transient formation of F-actin at the  
38 leading edge without cell-contact (Fig. 2F, left panels, magenta)[35], F-actin at the cell-cell contact

1 was persistent, long (~5 $\mu$ m) and appeared most strongly at the outer edge (Fig. 2F, right panels,  
2 magenta; Movie S4, Fig. S5A). The F-actin pattern was also observed in naturally streaming cells  
3 (Fig. S5B). The contact region was highly enriched in Arp2/3 (Fig. 2G) indicating that actin  
4 filaments form dendritic networks[36]. These observations are compatible with the general feature  
5 of a leading edge of migrating cells where dendritic F-actin networks grow mainly by side-branching  
6 nucleation mediated by Arp2/3 complex, while further away towards the cytosolic region, filaments  
7 are severed and depolymerized. The other widespread feature of the leading edge in various cells is  
8 the so-called ‘retrograde’ flow of F-actin due to excess filament growth relative to the speed of  
9 membrane expansion. Although solitary migrating *Dictyostelium* cells are known to lack obvious  
10 retrograde flow at the leading edge[37], timelapse images of F-actin at the cell-cell contact region were  
11 indicative of such flow (Movie S4). To quantitate the speed of retrograde flow of F-actin network,  
12 GFP-Arp2 incorporated in dendritic filaments was photobleached partially, and dislocation of the  
13 bleached region was followed over time. After photobleaching of GFP-Arp2, the non-fluorescent  
14 region moved backwards (Fig. 2G,H) at about 14  $\mu$ m/min in cell-contacted leading edge compared to  
15 1  $\mu$ m/min (Fig. 2I) in cell-contact-free leading edge, suggesting an enhanced nucleation at the contact-  
16 site.

17 The enhanced F-actin formation at the cell-contacted leading edge suggests that there is  
18 upregulation of Arp2/3 activity. In solitary migrating *Dictyostelium* cells, the SCAR complex which  
19 is required for full activation of the Arp2/3 complex translocated to the membrane in small patches  
20 that last no longer than ~10 sec [35](Fig. 2F, left, magenta). In contrast, at the cell-contacted leading  
21 edge, there was markedly enhanced localization of the SCAR complex (Fig. 2F; Movie S4). Major  
22 leading-edge signals such as Ras-GTP, PI(3,4,5)P3 and Rac-GTP were also present at the contacted-  
23 front, and appeared similar to contact-free leading edge (Fig. S5C-H). These observations suggest  
24 that the follower cells have a leading edge with persistent dendritic F-actin network that generates  
25 unidirectional propulsive force that pushes the plasma membrane forward. Accordingly, when leader  
26 cells were immobilized by UV irradiation, the follower cells continued to move and push the leader  
27 cells (Fig. 2J; Movie S5). The observation indicates contact-dependent protrusive activity that is  
28 independent of pulling by the front cell in contact.

29  
30 **TgrB1/C1 and contact-induced front protrusion.** The molecular basis of cell-train formation was  
31 further analyzed by studying binary mixtures of WT, *tgrB1*<sup>-</sup> and *tgrC1*<sup>-</sup>. We found that in cells that  
32 follow *tgrC1*<sup>-</sup>, F-actin formation failed to become persistent (Fig. 3A,B; Fig. S6A,B). The pair-wise  
33 frequency of the contact itself was also low when cells being followed were *tgrC1*<sup>-</sup> or when the  
34 following cells were *tgrB1*<sup>-</sup> (Fig. 3C), which is consistent with a recent study[30] suggesting that  
35 TgrB1 and TgrC1 act as a receptor and a ligand, respectively, for allorecognition. TgrB1/C1 are  
36 developmental stage specific genes, hence the protrusions and the elongated shape in developing cells  
37 were never induced by contact with vegetative cells unless TgrC1 was overexpressed (Fig. 3D; Fig. S  
38 6C,D). Moreover, streaming-stage cells were able to follow TgrC1 over-expressing vegetative cells

1 that migrated towards their chemoattractant folate (Fig. 3E; Movie S6). Since vegetative cells do not  
2 secrete cAMP nor do the streaming-stage cells chemotax to folate, contact-dependent front protrusion  
3 and cell guidance are mediated primarily by TgrB1/C1 and does not require chemoattraction.  
4 Furthermore, silica beads coated with purified TgrC1<sup>ext</sup> and lectin Wheat Germ Agglutinin (WGA)  
5 which binds to cell surface glycoproteins such as the homophilic adhesion protein CsA[38] were able  
6 to induce an extensive protrusion at the site of cell-microsphere contact (Fig. 3F). Much like cell  
7 trains, the cell-microsphere contact site was intensely decorated with the SCAR complex and F-actin  
8 (Fig. 3F; Movie S7). Microsphere coated with WGA alone or TgrC1<sup>ext</sup> alone was unable to induce  
9 the characteristic protrusion (Fig. S6E). The results indicate that juxtacrine signaling between TgrC1  
10 at the tail of a cell and TgrB1 at the front of a cell activates SCAR complex and induce highly enhanced  
11 formation of F-actin at the cell-cell contact site.

12 Despite their spatially restricted mechanism of action, TgrB1 was localized to the front and  
13 the back of collectively moving cells whereas TgrC1 was observed uniformly at the plasma membrane  
14 (Fig. 3G; Fig. S7A-C). Lack of front/back symmetry breaking was puzzling considering that, in cell  
15 trains and aggregates, cells did not form two fronts in the opposing directions. In cells attached to 2  
16 coated beads, cells indeed formed a front protrusion on one bead, and the other bead was attached to  
17 their tail except in cases where protrusions faced the same directions and hence cells were double-  
18 headed in shape (Fig. S7D). These results suggest that a protrusion is inhibited from forming at the  
19 tail once cells polarize. Interestingly, the choice of a bead to which protrusion formed sometimes  
20 swapped between the two (Fig. S7E) suggesting that contact-mediated polarity is dynamically  
21 maintained and possibly mechanosensitive. Similar front competitions were often observed in a  
22 monolayer aggregate where TgrB1 first accumulated towards two cells which then split as the cells  
23 deviated, and a contact with one cell was selected (Fig. 3H; Movie S8).

24  
25 **Single-cell level response to navigational cues.** It has been hypothesized that prestalk cells sort to  
26 the tip by migrating fast and winning the chemotaxis race against prespore cells[21,31]. When  
27 assayed at the single-cell level, however, prespore cells migrated faster than prestalk cells in a 0-1  $\mu$ M  
28 cAMP linear gradient (Fig. 4A). Similar results were obtained from tracking well-isolated  
29 dissociated cells in the initial phase of reaggregation mitigated of contact signal by TgrB1<sup>ext</sup> (Fig. 4B).  
30 In a 0-10 or 0-50  $\mu$ M linear gradient, both cell types halted at the same location in the channel  
31 indicating a similar response range (Fig. S8). How then can cell-cell contacts facilitate cell  
32 segregation? When attached to TgrC1<sup>ext</sup>/WGA-coated microsphere (Fig. 4C), a marked protrusion  
33 was observed in about 1/3 of the cell-bead interface regardless of the cell-type (Fig. 4D). While the  
34 prespore cells exhibited a single protrusion at the contact site, many of the prestalk cells had auxiliary  
35 protrusions (Fig. 4C, arrows; Fig. 4E; Movie S9). When exposed to a cAMP gradient, the protrusion  
36 of prestalk cells at the bead-cell interface often disappeared and new pseudopods formed towards the  
37 cAMP source whereas prespore cells remained attached to the beads and retained the polarity (Fig.  
38 4F,G; Movie S10). The results indicate that prestalk and prespore can be oriented by cAMP and

1 TgrB1/C1, however when both signals are presented, there is a dominance as to which directs their  
2 leading edge. Prestalk cells prioritize response to cAMP and thus are chemotactically navigated,  
3 whereas prespore cells favor TgrB1/C1 and are navigated by cell-cell contact. Taken together with  
4 the results demonstrating requirements for two cues TgrC1 and cAMP for tip formation (Fig. 1C-H),  
5 the radial trajectories and the head-to-tail alignment of prespore cells is best explained by the Tgr-  
6 mediated navigation, whereas prestalk cells deviate from the contact-mediated collective migration  
7 and chemotax to extracellular cAMP (Fig. 4H).

8

## 9 **Discussion**

10 A propensity of *Dictyostelium* cells to follow cells in contact was suggested by a classic work  
11 by Shaffer and coined the term ‘contact-following’[39], however it has remained heretofore  
12 unclear[40,41]. In the present work, we conclude that the following behavior is driven by ‘contact  
13 activation of locomotion’ – an induction of leading edge by cell-cell contact and the accompanying  
14 forward propulsion. The cell-contacted leading edge was highly enriched in a SCAR complex  
15 subunit HSPC300 and dendritic F-actin. Since the same response was observed in cells attached to  
16 TgrC1/WGA-coated microspheres, there appears to be a mechanism whereby TgrB1/C1 interaction  
17 induces accumulation of the SCAR complex at the cell-cell contact site. Lack of apparent features  
18 in the cytosolic residues in TgrB1 and requirement for lectin WGA for the response points to a  
19 possibility that the interaction between TgrB1 and the SCAR complex is indirect and that there is  
20 clustering of adhesion and signaling complex at the contact site. The contact site appears distinct  
21 from that forming a phagocytosis cup, since the contact area appears to extend narrowly instead of  
22 expanding and engulfing. Retrograde flow of F-actin has been suggested to play a major role in  
23 determining front-back polarity and its persistence during cell migration [42]. In addition, it has been  
24 shown that F-actin flow and persistent cell polarity is induced by confinement and decrease in cell-  
25 substrate adhesiveness [43]. The observations of the retrograde flow, monopodal morphology and  
26 loss of cell-substrate adhesion in the cell anterior are in line with these current understanding of the  
27 requisites for strong cell polarity in migrating cells.

28 Our results indicate that TgrB1/C1 has cell-type specific effect on cell polarity. It is essential for  
29 prestalk/prespore segregation as evidenced by well-mixed distribution of cells in a mound when  
30 contact signal was interfered with purified TgrB1<sup>ext</sup> (Fig. 1C). While sorting of prestalk cells to the  
31 peripheral of the mound in the presence of PDE can be due to prestalk cells possibly being weakly  
32 cohesive [44], our data suggest that it accompanies their lesser ability to become monopodal and thus  
33 migrate directionally by contact. We should note that Myosin II accumulation at the plasma  
34 membrane has been shown to be stronger in prestalk cells than in prespore cells within a slug[45], and  
35 a null-mutant of myosin regulatory chain fails to form the mound tip [19]. Future studies are needed  
36 to clarify the molecular basis of cell polarity difference in prespore and prestalk cells.

37 The mechanism of collective migration in *Dictyostelium* uncovered in this study is in striking  
38 contrast to that of the neural crest cells. There, cell-cell contact signal mediated by Cadherin activates

1 RhoA, inhibits protrusion and facilitate cell repulsion [46]. On the other hand, migration towards self-  
2 secreted chemoattractant C3a keep neural crest cells together [47,48]. In *Dictyostelium*, cell-cell  
3 contact mediated by TgrB1/C1 promotes protrusion, and chemotaxis rather is disruptive to otherwise  
4 more tightly packed cell mass as evidenced by mounds becoming spherical in the absence of the  
5 chemotactic cue. The present findings raise many open questions for future works. Besides  
6 prestalk segregation, the migratory mechanism may be relevant to *Dictyostelium* slug migration,  
7 culmination as well as kin-discriminatory segregation[24,29]. Also of note is a striking evolutionary  
8 convergence of collective cell migration, despite no homologues of TgrB1/C1 exist in metazoans.  
9 Are there parallelisms to Protocadherin-dependent SCAR complex recruitment and enhancement of  
10 migration in cultured cells[49] or similar enhancement of F-actin by atypical cadherin in rotating  
11 *Drosophila* egg chamber[50]? Are other cell streaming behaviors such as those observed in Human  
12 breast cancer cells[51] driven by a related mechanism? Further investigations in these phenomena  
13 should clarify common rules and logical necessities for cellular collectivity.

## 16 Figure Legends

17  
18 **Figure 1 | Two navigational cues and the modes of collective movement underlie segregation of**  
19 **prestalk and prespore cells in a *Dictyostelium* mound.** A, Tip formation ( $t = 0, 25, 50$  min. Green:  
20 prestalk marker ecmAOp:GFP, magenta: prespore marker D19p:RFP). Scale bars, 50  $\mu\text{m}$ . B, Cell  
21 trajectories (upper panel, prestalk cells; lower panel, prespore). C-I, Interference of tip regenerating  
22 cues (Fig. S1E, Movie S1). Z-sections taken at 3 hr 40 min after plating (+BSA mock control,  
23 +TgrB1<sup>ext</sup>, +PDE, +TgrB1<sup>ext</sup>/+PDE)(c). Scale bars, 50  $\mu\text{m}$ . Schematic illustrations of cell motion  
24 (right panel). d-i, Timeseries of the mean cytosolic cAMP levels (D, F, H) in boxed regions ((E),  
25 (G), (H) upper left panels). Cell trajectories (98% Epac1-camps/AX4[16] : 2% Lifeact-RFP/AX4  
26 cells; +BSA (D, E), +TgrB1<sup>ext</sup> (F, G), +PDE (H, I)). Phase of the cAMP oscillations (E, G, I; upper  
27 panels)[15]. Trajectories of RFP labeled cells during one cycle of the oscillation (E, G, I; lower  
28 panels). Scale bars, 20  $\mu\text{m}$ .

29  
30 **Figure 2 | Microfluidics single-cell level analysis of train migration and contact-induced leading**  
31 **edge dynamics.** A, Train migration. GFP-Lifeact/AX4 (green) and Lifeact-RFP/AX4 (magenta).  
32 0-10 nM cAMP gradient (blue, ATTO425). Scale bar, 100  $\mu\text{m}$ . B, Snapshots of solitary (left) and  
33 2-cell train (right). Scale bar, 10  $\mu\text{m}$ . C, Cell contours (arrows, lateral pseudopods). Scale bars,  
34 10  $\mu\text{m}$ . D, Response to reversal of cAMP gradient (0-1  $\mu\text{M}$ ; magenta, Lifeact-RFP; green,  
35 fluorescein). Scale bars, 10  $\mu\text{m}$ . E, Fraction of cells with ('+') or without ('-') an immediate  
36 response (solitary:  $n = 73$  cells, leader:  $n = 28$  cells, follower:  $n = 97$  cells). F, A contact-free (left

1 panels) and a cell-cell contact (right panels) leading edge (green, HSPC300-GFP and magenta, Lifeact-  
2 RFP) in a 0-1  $\mu$ M cAMP gradient. Scale bars, 2  $\mu$ m. **G**, Fluorescence recovery after  
3 photobleaching in GFP-Arp2/AX4 cells (yellow boxed region) in a contact-free (left panels) and  
4 contacted (right panels) leading edge. White dashed line, a leading cell contour. 0-10 nM cAMP  
5 gradient. Scale bars, 1  $\mu$ m. **H**, Scatter plot of nucleation and protrusion speed. **I**, Slip speed of  
6 actin filaments. Mean  $\pm$  s.e.m., contact-free: n = 18 cells, cell-cell contact: n = 23 cells. **J**,  
7 Immobilization of a follower (upper panels) or a leader (lower panels) by UV irradiation. 0-10 nM  
8 cAMP gradient. Scale bars, 10  $\mu$ m.

9

10 **Figure 3 | Contact-based front protrusion and train migration is mediated by TgrB1/TgrC1**  
11 **interaction.** **A-B**, Contact-induced F-actin formation (left; C1<sup>-</sup>: tdTomato/*tgrC1*<sup>-</sup> (**A**), B1<sup>-</sup>:  
12 GFP/*tgrB1*<sup>-</sup> (**B**), WT: AX4) and their duration (right; n = 26 events (**A**), n = 38 events (**B**)). Scale  
13 bar, 5  $\mu$ m. **C**, Occurrence of head-to-tail contacts in 1:1 mixtures of GFP/*tgrB1*<sup>-</sup> (B1<sup>-</sup>, green),  
14 tdTomato/*tgrC1*<sup>-</sup> (C1<sup>-</sup>, magenta), Lifeact-RFP/AX4 (WT, magenta) and GFP-Lifeact/AX4 (green)  
15 (mean  $\pm$  s.e.m.; n = 3 trials each; 120 ~ 405 pairs total). **D**, Streaming-stage Lifeact-RFP/AX4 cells  
16 (magenta) attached to vegetative cells over-expressing TgrC1-GFP (upper left panel), TgrB1-RFP  
17 (middle left panel; CellTrackerGreen) or GFP-Lifeact (lower left panel). Occurrence of protrusions  
18 at the contact site (right panel; mean  $\pm$  s.e.m.; n = 3 trials; total 49(C1<sup>OE</sup>), 46(B1<sup>OE</sup>), 16(WT) pairs).  
19 Scale bars, 20  $\mu$ m. **E**, A streaming-stage Lifeact-RFP/AX4 cell (magenta) in contact with a  
20 vegetative-stage TgrC1-GFP over-expressing cell (blue) in a folate gradient (green, fluorescein; \*  
21 source direction). Scale bar, 10  $\mu$ m. **F**, Slug-stage HSPC300-GFP/Lifeact-RFP/AX4 cells attached  
22 to a TgrC1<sup>ext</sup>/WGA-coated microsphere (upper panels) or in isolation (lower panels) in a  
23 microchamber. Scale bars, 2  $\mu$ m. **G-H**, A chimeric monolayer of TgrB1-RFP/*tgrB1*<sup>-</sup> (magenta)  
24 and GFP-Lifeact/AX4 (green) in a microchamber. Scale bar, 10  $\mu$ m. Splitting of a TgrB1-RFP  
25 enriched leading edge (**H**, 0.5 min) and selection of a single contact-site (**H**, 1.5 min).

26

27 **Figure 4 | Single-cell level analysis of migratory response to navigational cues.** **A**, Speed of  
28 isolated single-cells in 0-1  $\mu$ M cAMP gradient (mean  $\pm$  s.e.m., prespore: n = 33 cells, prestalk: n = 10  
29 cells). **B**, Speed of single-cells during re-aggregation in the presence of purified TgrB1<sup>ext</sup> (mean  $\pm$   
30 s.e.m., prespore: n = 28 cells, prestalk: n = 19 cells). **C**, A prestalk (green, GFP) and a prespore  
31 (magenta, RFP) cell attached to a TgrC1<sup>ext</sup>/WGA-coated microsphere. Prestalk cells form lateral  
32 protrusions (arrows). Scale bars, 10  $\mu$ m. **D**, Frequency of cell-bead contact dependent polarization  
33 (mean  $\pm$  s.e.m.; n = 3 trials). **E**, Number of lateral protrusion formed in cells attached to beads and  
34 elongated within 5 minutes (prespore: n = 23 cells, prestalk: n = 13 cells). **F**, Polarized cells attached  
35 to beads stimulated with a cAMP gradient (green, fluorescein; \* source direction). Scale bars, 10  $\mu$ m.



1 **G**, Percentage of cells that maintain Tgr-mediated polarity ('TgrB1/C1') or abort the contact by  
2 protruding towards a cAMP gradient ('cAMP'). Prespore: n = 19 cells, prestalk: n = 7 cells. **H**. A  
3 schematic illustration of the cell navigation rule.

## 6 **METHODS**

7  
8 **Plasmid construction.** His-tagged TgrB1 and TgrC1 expression vectors pA15-tgrB1<sup>ext</sup>-His<sub>6</sub>-  
9 2H3term and pA15-tgrC1<sup>ext</sup>-His<sub>6</sub>-2H3term were constructed as follows. The expression cassette of  
10 pA15-GFP(S/T) was replaced with an expression cassette harboring the *act15* promoter, a *ClaI/XhoI*  
11 cloning cite and 2H3 terminator by *XbaI* and *HindIII* digest (pA15-2H3term). Complementary  
12 strands of synthetic His<sub>6</sub>-tag DNA oligos (Fasmac) were annealed and inserted into the pA15-2H3term  
13 vector at *ClaI/XhoI* sites by ligation. Genomic DNA fragments from the start codon to the codon just  
14 before the predicted transmembrane regions (*tgrB1*; Met1 to Thr802. *tgrC1*; Met1 to Asn851) were  
15 PCR amplified using Phusion polymerase (New England Biolab). The cloned fragments were  
16 verified by DNA sequencing and inserted into the *ClaI* cite of pA15-2H3term using Infusion HD  
17 cloning kit (Takara Z9633N) according to the manufacture's protocol except that reaction volume was  
18 5 μL containing 1μL premix, and the reaction time was extended to 1 hr.

19 TgrB1-RFP TgrC1-GFP expression vectors were constructed as follows. The *tgrB1* gene including  
20 the promoter and the ORF except the stop codon was amplified with an additional N-terminal *NheI*  
21 site and a C-terminal (G<sub>4</sub>S)<sub>2</sub> linker sequence[52] and a *ClaI* site by PCR. Vector pHygTm(+) was  
22 cut by *XbaI/ClaI* to replace the *act15* promoter with the amplified *tgrB1* fragment to obtain pHyg-  
23 [tgrB1p]:tgrB1-(G<sub>4</sub>S)<sub>2</sub>-mRFP1. The vector with [tgrC1p]:tgrC1-(G<sub>4</sub>S)<sub>2</sub>-GFP was constructed  
24 similarly except that the *tgrC1* was cloned into pA15-GFP(S/T) for G418 resistance. TgrB1-RFP or  
25 TgrC1-GFP over-expression vectors were constructed by exchanging the native promoter in the  
26 plasmid with [tgrB1p]:tgrB1-(G<sub>4</sub>S)<sub>2</sub>-mRFP1 or [tgrC1p]:tgrC1-(G<sub>4</sub>S)<sub>2</sub>-GFP with the *act15* promoter.  
27 A prestalk GFP marker plasmid pEcmAO-GFP was constructed by replacing mRFPmars in pEcmAO-  
28 mRFPmars with GFP(S65T) at *Bg/III* and *XhoI* sites.

29  
30  
31 **Transformation and cell culture.** Purified plasmids were used to transform *Dictyostelium* cells by  
32 electroporation following a standard protocol[53] and selected using 10 μg/mL G418 or 60 μg/mL  
33 Hygromycin. Following strains of *Dictyostelium discoideum* were used for live-cell imaging  
34 analysis: AX4 and its derivatives GFP-Lifeact[54]/AX4, Lifeact-mRFPmars[55]/AX4, GFP/*tgrB1*<sup>-</sup>,  
35 tdTomato/*tgrC1*<sup>-</sup>, GFP-Arp2/AX4, HSPC300-GFP[56]/Lifeact-mRFPmars/AX4, PakBCRIB-

1 mRFP[56]/GFP-Lifeact/AX4, GFP-Lifeact/mRFPmars-Raf1RBD[17]/AX4, GFP-Lifeact/PHcrac-  
2 RFP/AX4, pEcmAO-GFP/pD19-RFP/AX4, Epac1-camps[57]/AX4, [tgrB1p]:tgrB1-RFP/*tgrB1*<sup>-</sup>,  
3 [tgrC1p]:tgrC1-GFP/*tgrC1*<sup>-</sup>, [act15p]:tgrB1-RFP/AX4, [act15p]:tgrC1-GFP/AX4. To obtain  
4 pEcmAO-GFP/pD19-RFP/AX4, AX4 cells were co-transformed by electroporation with plasmids  
5 pEcmAO-GFP and pD19-RFP. Phenotypes of TgrC1 or TgrB1 expressing clones in the respective  
6 knockout background varied on a bacteria plate likely due to stringency on the expression level.  
7 Clones whose null-phenotype of fruiting bodies were rescued were chosen for analysis.

8 Cells were grown in modified HL5 medium[15] with appropriate selection drugs at 22°C using a  
9 rotary shaker. To obtain the “streaming-stage” cells, cells were removed of nutrient by 3 repeated  
10 cycles of centrifugation at 700 ×g for 3 min and resuspension in Phosphate Buffer (PB: 12 mM  
11 KH<sub>2</sub>PO<sub>4</sub>, 8 mM Na<sub>2</sub>HPO<sub>4</sub>, pH 6.5). Washed cells were suspended at the final density of 5 × 10<sup>6</sup>  
12 cells/mL and shaken for 6 to 8 hrs at 125 rpm at 22°C. cAMP pulses (final conc. 50 nM) were applied  
13 at 6 min intervals after 1 hr using a peristaltic pump (Masterflex L/S, Cole-Permer). To obtain “slug-  
14 stage” cells, washed cells were suspended in Developmental Buffer (DB: 6 mM KH<sub>2</sub>PO<sub>4</sub>, 4 mM  
15 Na<sub>2</sub>HPO<sub>4</sub>, 2 mM MgSO<sub>4</sub>, 0.2 mM CaCl<sub>2</sub>, pH 6.5) and plated on an agar dish (1% agar (Bacto) in DB)  
16 at final density of 6.6 × 10<sup>3</sup> cells/mm<sup>2</sup> to obtain a monolayer[16]. The cells were incubated in a dark  
17 condition at 22°C for 17 to 21 hrs before collection. Slugs were suspended in 1 mL of PB and  
18 mechanically dissociated by running it through a 23G needle (NN-2332R, Termo) back and forth using  
19 a syringe 10 times. Dissociated cells were washed and resuspended in 1mL of PB.

20

21 **Reagents.** 100 mM cAMP-Na (A6885, Sigma) solution was dissolved in water and stored at –  
22 20°C as a master stock; working solution was 100 μM. Folate (060-01802, Wako) was dissolved in  
23 PB at 10 μM and used as a working solution. Fluorescein (231-00092, Wako) was dissolved in water  
24 at 1 mM and stored at 4°C. ATTO425 (AD425-21, ATTO TEC) and Alexa594 (A10438, Invitrogen)  
25 were dissolved in DMSO at 1 mg/mL and stored at –20°C. SQ22536 (505-44021, Wako) was  
26 dissolved in PB at 10 mM and stored at –20°C. Wheat germ agglutinin (WGA: 126-02811, Wako)  
27 was dissolved in water at 1 mg/mL and stored at –20°C. cAMP-specific phosphodiesterase (P0520-  
28 1UN, SIGMA) was dissolved in PB at 1 to 2 unit/mL and stored at 4°C.

29

30 **Microfabrication.** Poly-dimethylsiloxane (PDMS) chambers were fabricated as described  
31 previously[58]. In brief, blank masks (CBL4006Du-AZP, clean surface technology, Japan) were  
32 UV-irradiated by laser drawing system (DDB-201-TW, Neoark, Japan) and chemically etched to  
33 create photomasks. Photoresists SU-8 3005 and 3050 (Microchem, USA) were used to create molds  
34 of the chambers. The thickness of SU-8 which determines the height of the microchamber for  
35 observation channel was approximately 4-5 μm for the gradient chamber (Fig. S2A and S4A), 4 μm

1 for the low ceiling chamber for multicellular observations (Fig. S7B). The mask was placed on top  
2 of a SU-8 coated wafer and UV-irradiated using a mask aligner (MA-20, Mikasa, Japan). The cured  
3 SU-8 was used as a mold to fabricate PDMS. Glass cover slips (No. 1 or 1S, 24 × 60 mm or 50 × 60  
4 mm, Matsunami) were washed in four steps using basic detergent, ethanol, NaOH solution, then rinsed  
5 in milli-Q water. Washed cover slips were dried at 140°C in a sterilization oven. The cover slips  
6 and fabricated PDMS were treated with air plasma, bonded and heated at 75°C for 1 hr.

7  
8 **Flow chamber and stimulus delivery.** Flow was controlled using a pressure regulator (Microfluidic  
9 Flow Control System (MFCS), Fluigent) or a syringe pump (70-4506, Harvard) as described  
10 previously[59]. A PDMS chamber was connected to the MFCS device with ethylene  
11 tetrafluoroethylene (ETFE) tubes. 5 µg/mL ATTO425, 3 µM fluorescein or 4 µg/mL Alexa594 was  
12 included in the cAMP solution to visualize the gradient profile. For assays of streaming-stage cells  
13 in the gradient chamber, 50 µM SQ22536[16,33] was included in the perfusion to inhibit adenylyl  
14 cyclase. Gradient was reversed by programmed flow control using a MFCS scripting module. For  
15 quantification in Figure 2E, timelapse series from 27 channels in total were acquired with 20×  
16 objective lens. Cells positioned at 95 to 378 µm from edge of the observation channel (0 to 473 µm)  
17 was analyzed. ‘Chemotaxis’ to gradient reversal was defined by formation of contact-free leading  
18 edge and migration toward a new gradient (Fig. 2E). Cell speed in Figures 4A and B was calculated  
19 from cell trajectories obtained by manually tracking cell centroid using ImageJ MTrackJ plugin. A  
20 glass needle (Femtotip, Eppendorf) was backloaded with either 100 µM cAMP or 10 µM folate  
21 solution in PB containing 10 µM fluorescein (Fig. 3E, Fig. 4F,G). To stimulate cells attached to a  
22 coated-microsphere, the needle was positioned approximately 20 µm from the cell of interest using a  
23 manipulator (TransferMan, Eppendorf), and cAMP gradient was formed by pressuring the needle at  
24 80 hPa using an injection pump (Femtojet, Eppendorf)[60]. ‘Response’ to cAMP was defined by  
25 appearance of a protrusion toward the cAMP source and simultaneous loss of a contact-dependent  
26 protrusion (Fig. 4G).

27  
28  
29 **Microscopy and Image Analysis.** All fluorescence images were obtained by confocal microscopy.  
30 With some exceptions (see below), data were obtained by an inverted microscope (Ti-E, Nikon)  
31 equipped with a laser confocal point-scanning unit (A1R, Nikon) using a Galvano scanner except for  
32 data in Fig. S5A where a fast resonant scanner was employed. For UV-irradiation, 405 nm laser (100  
33 mW CUBE, Coherent, at max power) was employed. For photobleaching of GFP-Arp2 (Fig. 2F-H),  
34 488 nm laser (100 mW CUBE, Coherent, at max power) was used to irradiate 0.25 × 4.88 µm (8 × 157  
35 pixels) rectangular ROI positioned halfway between the ends of F-actin filaments. The length of

1 actin filaments 1.26 sec and 3.15 sec after bleaching were measured manually, and the difference  
2 between them was defined as nucleation speed. The displacement of the tip of filament at the same  
3 time frames was defined as protrusion speed. Slip speed was calculated by subtracting protrusion  
4 speed from nucleation speed.

5 For data in Fig. 3E, 4F-G, an inverted microscope IX81 (Olympus) equipped with a multi-scan laser  
6 confocal unit CSU-X1 (Yokogawa) with EMCCD camera (Evolve512, Photometrics) was used. For  
7 data in Fig. 1C-I, 3D, 3F, and Fig. S1A-B, S6C-D, an inverted microscope IX83 (Olympus) equipped  
8 with CSU-W1 with a EMCCD camera (iXon 888, Andor) was used. 445 nm, 488 nm and 561 nm  
9 lasers were used for excitation, and fluorescence images were obtained by appropriate filters. Piezo  
10 z-stages were used for z-sectional imaging. Live-cell imaging was performed at 22°C. All images  
11 were stored as TIFF files and analyzed using homemade programs in ImageJ and MATLAB  
12 (Mathworks).

13 To obtain relative changes in the cytosolic cAMP level (Fig. 1D,F,H), the ratio of fluorescence  
14 intensities of Epac1-camps/AX4 in the CFP-channel ( $I_{472/30}$ ) and the YFP-channel ( $I_{542/27}$ ) was  
15 averaged in a rectangle region ( $24 \times 36$  pixels). For calculation of the phase by time-delay embedding  
16 (Fig. 1E,G,I), the mean fluorescence intensities in the CFP-channel and the YFP-channel images were  
17 averaged by moving timeframes (5 time points; 60 sec) and the background was subtracted. The  
18 background was obtained by averaging over 31 time points (450 sec) in moving time frames. The  
19 average fluorescence intensities  $\overline{I(t)}$  were obtained for all positions by  $5 \times 5$  pixels binning. Phase  
20 was defined by an angle in the embedding space ( $\overline{I(t)}$ ,  $\overline{I(t + 75sec)}$ ). Lifeact-RFP expressing cells  
21 were manually tracked during  $\pm 3$  minutes at each time points.

22 Quantification of cell morphology (Fig. S3), was performed as previously described[58] with some  
23 extensions. Velocity was obtained by calculating displacement projected normal to the cell contour  
24 per unit time and averaged over 3 neighboring positions and 3 time points. The sign of velocity was  
25 negative for inward projections. Localization of Lifeact-RFP or GFP-Lifeact at cell boundaries were  
26 calculated by taking the average fluorescence intensities for each  $3 \times 3$  pixels regions at the boundary  
27 (rounded coordinates; 500 positions) and dividing it by the mean fluorescence intensities of the  
28 cytosolic region for normalization.

29 Duration of F-actin enrichment at the cell-cell interface (Fig. 3A,B, Fig. S6A,B) was measured  
30 based on the appearance of strong F-actin accumulation especially near the periphery of cell-cell  
31 contact. For the statistics of cell-cell contact, cells in contact for longer than 2 minutes were counted.  
32 For the analysis of head-to-tail pairing in binary cell mixtures (Fig. 3C), relative positioning of cell-  
33 types within cell trains were identified and counted manually based on the fluorescent labels.  
34 Frequency of pairing was corrected by total detected cell number of each mixed strain to eliminate the  
35 cell number bias. Cells attached to vegetative cells or a microsphere (Fig. 3D, Fig. 4D, Fig. S6E)

1 was identified as polarized if the elongated shape at the cell-cell or cell-bead contact region lasted for  
2 more than 10 minutes. Protrusive structures from the lateral side of polarized cells that lasted at least  
3 18 sec were counted as lateral pseudopods (Fig. 4E).

4  
5  
6 **Purification of TgrB1<sup>ext</sup> and TgrC1<sup>ext</sup> and microsphere coating.** Cells harboring pA15-tgrB1<sup>ext</sup>-  
7 His<sub>6</sub>-2H3term or pA15-tgrC1<sup>ext</sup>-His<sub>6</sub>-2H3term were designed to secrete extracellular domain of TgrB1  
8 and TgrC1, respectively (Fig. S1C). To verify secretion of recombinant proteins, TgrB1<sup>ext</sup> and  
9 TgrC1<sup>ext</sup> were extracted from growth medium by His Mag Sepharose excel (GE healthcare, 17-3712-  
10 21) according to the manufacturer's protocol. The expected 150 kDa band was confirmed by SDS-  
11 PAGE and western blot using a 6xHis monoclonal antibody (MBL, D291-3) (Fig. S1D). For lab-  
12 scale production, the cells were grown shaken in modified HL5 medium for 2 days until they reached  
13 approximately  $1 \times 10^7$  cells/mL. The typical working volume was 660 mL split into two 1 L flasks.  
14 The medium was separated from the cells by centrifugation and passed through a syringe filter (0.22  
15  $\mu\text{m}$  or 0.45  $\mu\text{m}$ ). The His-tagged protein TgrB1<sup>ext</sup>-His<sub>6</sub> or TgrC1<sup>ext</sup>-His<sub>6</sub> was purified by affinity  
16 chromatography (AKTA pure 25M2, GE Healthcare) using a nickel-nitrilotriacetic acid (Ni<sup>2+</sup>-NTA)  
17 column (His Trap FF crude 5mL). Captured His-tagged protein was eluted in 20 mL of PBS with an  
18 optimized concentration of imidazole. 20 mL of the eluate was concentrated 10-fold using a spin  
19 column (Amicon Ultra 15mL 50K, Millipore), diluted in 15 mL of PB. The sample was further  
20 concentrated to 700  $\mu\text{L}$  using the spin column by repeating the process twice. The final yield based  
21 on the absorbance at 280 nm was 0.1-0.6 mg/mL for TgrC1 and 1-1.5 mg/mL for TgrB1. Purified  
22 samples were stored in 1.5 mL tube at 4°C.

23 Purified TgrC1<sup>ext</sup> was immobilized to functionalized silica beads (5  $\mu\text{m}$  diameter, Sumitomo  
24 Bakelite BS-X9905) by covalent bond according to the manufacturer's protocol. Briefly, 2 to 4 mg  
25 of dry beads were suspended in immobilization buffer and mixed with either 20  $\mu\text{g}$  of the purified  
26 protein, 20  $\mu\text{g}$  wheat germ agglutinin (WGA) or both. The mixture was incubated overnight at room  
27 temperature in a plastic tube gently rotated at 30 rpm. Beads were collected by centrifugation, and  
28 resuspended in 0.5 mL of PBS. The process was repeated two more times. The beads were then  
29 suspended in 400  $\mu\text{L}$  of inactivation buffer in a plastic tube and gently agitated by rotation at 30 rpm  
30 for 1 hr. The inactivated beads were collected by centrifugation and suspended in 0.5 mL of PBS.  
31 Washing was repeated thrice, before finally suspending the beads in 0.2 mL of PB. The coated beads  
32 were stored at 4°C.

33  
34 **Observations of regenerating mounds.** To obtain a thin agar film, 200  $\mu\text{L}$  of 1% Agar / DB was  
35 poured on a glass bottom dish, covered the glass (15 mm diameter) entirely, then removed to leave

1 small residues typically of 30  $\mu\text{m}$  height.  $1 \times 10^6$  mechanically dissociated cells were pelleted by  
2 centrifugation, then resuspended in 10  $\mu\text{L}$  of PB or 1 unit/mL PDE or 1 mg/mL TgrB1 or 1% BSA.  
3 Cells were spread on a thin agar film using a pipette tip with care not to touch the agar, and allowed to  
4 settle for 10 minutes. A wet Kimwipe was included in the glass bottom dish, and the lid was closed  
5 during observation to avoid sample from drying.

6  
7

## 8 **Data Availability**

9

10 The data that support the findings of this study are available from the corresponding author upon  
11 request.

12  
13

## 14 **References:**

- 15 1. Cerchiari AE, Garbe JC, Jee NY, Todhunter ME, Broaders KE, Peehl DM, et al. A strategy  
16 for tissue self-organization that is robust to cellular heterogeneity and plasticity. *Proc Natl*  
17 *Acad Sci USA*. 2015;112: 2287–2292. doi:10.1073/pnas.1410776112
- 18 2. Xiong F, Tentner AR, Huang P, Gelas A, Mosaliganti KR, Souhait L, et al. Specified neural  
19 progenitors sort to form sharp domains after noisy Shh signaling. *Cell*. 2013;153: 550–561.  
20 doi:10.1016/j.cell.2013.03.023
- 21 3. Kay RR, Thompson CRL. Forming patterns in development without morphogen gradients:  
22 scattered differentiation and sorting out. *Cold Spring Harb Perspect Biol*. 2009;1: a001503.  
23 doi:10.1101/cshperspect.a001503
- 24 4. Townes PL, Holtfreter J. Directed movements and selective adhesion of embryonic amphibian  
25 cells. *J Exp Zool*. 1955;128: 53–120. doi:10.1002/jez.1401280105
- 26 5. Krens SFG, Heisenberg C-P. Cell sorting in development. *Curr Top Dev Biol*. Elsevier;  
27 2011;95: 189–213. doi:10.1016/B978-0-12-385065-2.00006-2
- 28 6. Foty RA, Pflieger CM, Forgacs G, Steinberg MS. Surface tensions of embryonic tissues  
29 predict their mutual envelopment behavior. *Development*. 1996;122: 1611–1620.
- 30 7. Graner F, Glazier J. Simulation of biological cell sorting using a two-dimensional extended  
31 Potts model. *Phys Rev Lett*. 1992;69: 2013–2016. doi:10.1103/PhysRevLett.69.2013

- 1 8. Krieg M, Arboleda-Estudillo Y, Puech P-H, Käfer J, Graner F, Müller DJ, et al. Tensile forces  
2 govern germ-layer organization in zebrafish. *Nat Cell Biol.* 2008;10: 429–436.  
3 doi:10.1038/ncb1705
- 4 9. Krens SFG, Veldhuis JH, Barone V, Čapek D, Maître J-L, Brodland GW, et al. Interstitial  
5 fluid osmolarity modulates the action of differential tissue surface tension in progenitor cell  
6 segregation during gastrulation. *Development.* 2017;144: 1798–1806. doi:10.1242/dev.144964
- 7 10. Méhes E, Vicsek T. Segregation mechanisms of tissue cells: from experimental data to  
8 models. *Complex Adapt Syst Model.* Springer; 2013;1: 4. doi:10.1371/journal.pone.0024999
- 9 11. Yang X, Dormann D, Münsterberg AE, Weijer CJ. Cell movement patterns during  
10 gastrulation in the chick are controlled by positive and negative chemotaxis mediated by  
11 FGF4 and FGF8. *Dev Cell.* 2002;3: 425–437. doi:10.1016/S1534-5807(02)00256-3
- 12 12. Wyngaarden LA, Vogeli KM, Ciruna BG, Wells M, Hadjantonakis A-K, Hopyan S. Oriented  
13 cell motility and division underlie early limb bud morphogenesis. *Development.* 2010;137:  
14 2551–2558. doi:10.1242/dev.046987
- 15 13. Tomchik KJ, Devreotes PN. Adenosine 3′,5′-monophosphate waves in *Dictyostelium*  
16 *discoideum*: a demonstration by isotope dilution–fluorography. *Science.* 1981;212: 443–446.  
17 doi:10.1126/science.6259734
- 18 14. Siegert F, Weijer CJ. Analysis of optical density wave propagation and cell movement in the  
19 cellular slime mould *Dictyostelium discoideum*. *J Cell Sci.* 1989;93: 325–335.
- 20 15. Sawai S, Thomason PA, Cox EC. An autoregulatory circuit for long-range self-organization in  
21 *Dictyostelium* cell populations. *Nature.* 2005;433: 323–326. doi:10.1038/nature03228
- 22 16. Gregor T, Fujimoto K, Masaki N, Sawai S. The onset of collective behavior in social  
23 amoebae. *Science.* 2010;328: 1021–1025. doi:10.1126/science.1183415
- 24 17. Nakajima A, Ishihara S, Imoto D, Sawai S. Rectified directional sensing in long-range cell  
25 migration. *Nat Commun.* 2014;5: 5367. doi:10.1038/ncomms6367
- 26 18. Nicol A, Rappel W, Levine H, Loomis WF. Cell-sorting in aggregates of *Dictyostelium*  
27 *discoideum*. *J Cell Sci.* 1999;112: 3923–3929.
- 28 19. Clow PA, Chen T, Chisholm RL, McNally JG. Three-dimensional in vivo analysis of

- 1 Dictyostelium mounds reveals directional sorting of prestalk cells and defines a role for the  
2 myosin II regulatory light chain in prestalk cell sorting and tip protrusion. *Development*.  
3 2000;127: 2715–2728.
- 4 20. Traynor D, Kessin RH, Williams JG. Chemotactic sorting to cAMP in the multicellular stages  
5 of Dictyostelium development. *Proc Natl Acad Sci USA*. 1992;89: 8303–8307.  
6 doi:10.1073/pnas.89.17.8303
- 7 21. Vasiev B, Weijer CJ. Modeling chemotactic cell sorting during Dictyostelium discoideum  
8 mound formation. *Biophys J*. 1999;76: 595–605. doi:10.1016/S0006-3495(99)77228-0
- 9 22. Matsukuma S, Durston AJ. Chemotactic cell sorting in Dictyostelium discoideum. *J Embryol*  
10 *Exp Morphol*. 1979;50: 243–251.
- 11 23. Chen G, Wang J, Xu X, Wu X, Piao R, Siu C-H. TgrC1 mediates cell-cell adhesion by  
12 interacting with TgrB1 via mutual IPT/TIG domains during development of Dictyostelium  
13 discoideum. *Biochem J*. 2013;452: 259–269. doi:10.1042/BJ20121674
- 14 24. Hirose S, Santhanam B, Katoh-Kurosawa M, Shaulsky G, Kuspa A. Allorecognition, via  
15 TgrB1 and TgrC1, mediates the transition from unicellularity to multicellularity in the social  
16 amoeba Dictyostelium discoideum. *Development*. 2015;142: 3561–3570.  
17 doi:10.1242/dev.123281
- 18 25. Dynes JL, Clark AM, Shaulsky G, Kuspa A, Loomis WF, Firtel RA. LagC is required for cell-  
19 cell interactions that are essential for cell-type differentiation in Dictyostelium. *Genes Dev*.  
20 *Cold Spring Harbor Lab*; 1994;8: 948–958. doi:10.1101/gad.8.8.948
- 21 26. Sukumaran S, Brown JM, Firtel RA, McNally JG. lagC-null and gbf-null cells define key  
22 steps in the morphogenesis of Dictyostelium mounds. *Dev Biol*. 1998;200: 16–26.  
23 doi:10.1006/dbio.1998.8934
- 24 27. Iranfar N, Fuller D, Loomis WF. Transcriptional regulation of post-aggregation genes in  
25 Dictyostelium by a feed-forward loop involving GBF and LagC. *Dev Biol*. 2006;290: 460–  
26 469. doi:10.1016/j.ydbio.2005.11.035
- 27 28. Siu CH, Roches Des B, Lam TY. Involvement of a cell-surface glycoprotein in the cell-sorting  
28 process of Dictyostelium discoideum. *Proc Natl Acad Sci USA*. 1983;80: 6596–6600.  
29 doi:10.1073/pnas.80.21.6596



- 1 29. Hirose S, Benabentos R, Ho H-I, Kuspa A, Shaulsky G. Self-recognition in social amoebae is  
2 mediated by allelic pairs of tiger genes. *Science*. 2011;333: 467–470.  
3 doi:10.1126/science.1203903
- 4 30. Hirose S, Chen G, Kuspa A, Shaulsky G. The polymorphic proteins TgrB1 and TgrC1  
5 function as a ligand-receptor pair in Dictyostelium allorecognition. *J Cell Sci*. 2017;130:  
6 4002–4012. doi:10.1242/jcs.208975
- 7 31. Jiang Y, Levine H, Glazier J. Possible cooperation of differential adhesion and chemotaxis in  
8 mound formation of Dictyostelium. *Biophys J*. 1998;75: 2615–2625. doi:10.1016/S0006-  
9 3495(98)77707-0
- 10 32. Garrod DR. The cellular basis of movement of the migrating grex of the slime mould  
11 Dictyostelium discoideum: chemotactic and reaggregation behaviour of grex cells. *J Embryol*  
12 *Exp Morphol*. 1974;32: 57–68.
- 13 33. Alvarez-Curto E, Weening KE, Schaap P. Pharmacological profiling of the Dictyostelium  
14 adenylate cyclases ACA, ACB and ACG. *Biochem J*. 2007;401: 309–316.  
15 doi:10.1042/BJ20060880
- 16 34. Kriebel PW, Barr VA, Parent CA. Adenylyl cyclase localization regulates streaming during  
17 chemotaxis. *Cell*. 2003;112: 549–560. doi:10.1016/S0092-8674(03)00081-3
- 18 35. Huang C-H, Tang M, Shi C, Iglesias PA, Devreotes PN. An excitable signal integrator couples  
19 to an idling cytoskeletal oscillator to drive cell migration. *Nat Cell Biol*. 2013;15: 1307–1316.  
20 doi:10.1038/ncb2859
- 21 36. Pollard TD, Borisy GG. Cellular motility driven by assembly and disassembly of actin  
22 filaments. *Cell*. 2003;112: 453–465. doi:10.1016/S0092-8674(03)00120-X
- 23 37. Fukui Y, Kitanishi-Yumura T, Yumura S. Myosin II-independent F-actin flow contributes to  
24 cell locomotion in dictyostelium. *J Cell Sci*. 1999;112 ( Pt 6): 877–886.
- 25 38. Yoshida M, Stadler J, Bertholdt G, Gerisch G. Wheat germ agglutinin binds to the contact site  
26 A glycoprotein of Dictyostelium discoideum and inhibits EDTA-stable cell adhesion. *EMBO*  
27 *J*. 1984;3: 2663–2670.
- 28 39. Shaffer BM. Intracellular movement and locomotion of cellular slime-mold amoebae. In:  
29 Allen RD, Kamiya N, editors. *Primitive Motile Systems in Cell Biology*. Dordrecht: Springer

- 1 Netherlands; 1964. pp. 387–405.
- 2 40. Dormann D, Weijer G, Parent CA, Devreotes PN, Weijer CJ. Visualizing PI3 kinase-mediated  
3 cell-cell signaling during Dictyostelium development. *Curr Biol.* 2002;12: 1178–1188.  
4 doi:10.1016/S0960-9822(02)00950-8
- 5 41. Umeda T, Inouye K. Possible role of contact following in the generation of coherent motion of  
6 Dictyostelium cells. *J Theor Biol.* 2002;219: 301–308. doi:10.1006/jtbi.2002.3124
- 7 42. Maiuri P, Rupprecht J-F, Wieser S, Ruprecht V, Bénichou O, Carpi N, et al. Actin Flows  
8 Mediate a Universal Coupling between Cell Speed and Cell Persistence. *Cell.* 2015;161: 374–  
9 386. doi:10.1016/j.cell.2015.01.056
- 10 43. Liu Y-J, Le Berre M, Lautenschlaeger F, Maiuri P, Callan-Jones A, Heuzé M, et al.  
11 Confinement and low adhesion induce fast amoeboid migration of slow mesenchymal cells.  
12 *Cell.* 2015;160: 659–672. doi:10.1016/j.cell.2015.01.007
- 13 44. Lam TY, Pickering G, Geltosky J, Siu CH. Differential cell cohesiveness expressed by  
14 prespore and prestalk cells of Dictyostelium discoideum. *Differentiation.* 1981;20: 22–28.  
15 doi:10.1111/j.1432-0436.1981.tb01151.x
- 16 45. Yumura S, Kurata K, Kitanishi-Yumura T. Concerted movement of prestalk cells in migrating  
17 slugs of Dictyostelium revealed by the localization of myosin. *Dev Growth Differ.* 1992;34:  
18 319–328. doi:10.1111/j.1440-169x.1992.tb00021.x
- 19 46. Carmona-Fontaine C, Matthews HK, Kuriyama S, Moreno M, Dunn GA, Parsons M, et al.  
20 Contact inhibition of locomotion in vivo controls neural crest directional migration. *Nature.*  
21 2008;456: 957–961. doi:10.1038/nature07441
- 22 47. Carmona-Fontaine C, Theveneau E, Tzekou A, Tada M, Woods M, Page KM, et al.  
23 Complement fragment C3a controls mutual cell attraction during collective cell migration.  
24 *Dev Cell.* 2011;21: 1026–1037. doi:10.1016/j.devcel.2011.10.012
- 25 48. Mayor R, Etienne-Manneville S. The front and rear of collective cell migration. *Nat Rev Mol*  
26 *Cell Biol.* 2016;17: 97–109. doi:10.1038/nrm.2015.14
- 27 49. Nakao S, Platek A, Hirano S, Takeichi M. Contact-dependent promotion of cell migration by  
28 the OL-protocadherin-Nap1 interaction. *J Cell Biol.* 2008;182: 395–410.  
29 doi:10.1083/jcb.200802069

- 1 50. Cetera M, Juan GRR-S, Oakes PW, Lewellyn L, Fairchild MJ, Tanentzapf G, et al. Epithelial  
2 rotation promotes the global alignment of contractile actin bundles during *Drosophila* egg  
3 chamber elongation. *Nat Commun.* 2014;5: 349. doi:10.1038/ncomms6511
- 4 51. Patsialou A, Bravo-Cordero JJ, Wang Y, Entenberg D, Liu H, Clarke M, et al. Intravital  
5 multiphoton imaging reveals multicellular streaming as a crucial component of in vivo cell  
6 migration in human breast tumors. *IntraVital.* 2014;2: e25294. doi:10.4161/intv.25294
- 7 52. Chen G, Xu X, Wu X, Thomson A, Siu C-H. Assembly of the TgrB1-TgrC1 cell adhesion  
8 complex during *Dictyostelium discoideum* development. *Biochem J.* 2014;459: 241–249.  
9 doi:10.1042/BJ20131594
- 10 53. Nellen W, Silan C, Firtel RA. DNA-mediated transformation in *Dictyostelium discoideum*:  
11 regulated expression of an actin gene fusion. *Mol Cell Biol.* 1984;4: 2890–2898.
- 12 54. Lemieux MG, Janzen D, Hwang R, Roldan J, Jarchum I, Knecht DA. Visualization of the  
13 actin cytoskeleton: different F-actin-binding probes tell different stories. *Cytoskeleton*  
14 (Hoboken). 2014;71: 157–169. doi:10.1002/cm.21160
- 15 55. Fukujin F, Nakajima A, Shimada N, Sawai S. Self-organization of chemoattractant waves in  
16 *Dictyostelium* depends on F-actin and cell-substrate adhesion. *J R Soc Interface.* 2016;13:  
17 20160233. doi:10.1098/rsif.2016.0233
- 18 56. Veltman DM, King JS, Machesky LM, Insall RH. SCAR knockouts in *Dictyostelium*: WASP  
19 assumes SCAR's position and upstream regulators in pseudopods. *J Cell Biol.* 2012;198: 501–  
20 508. doi:10.1083/jcb.201205058
- 21 57. Nikolaev VO, Bünemann M, Hein L, Hannawacker A, Lohse MJ. Novel single chain cAMP  
22 sensors for receptor-induced signal propagation. *J Biol Chem.* 2004;279: 37215–37218.  
23 doi:10.1074/jbc.C400302200
- 24 58. Nakajima A, Ishida M, Fujimori T, Wakamoto Y, Sawai S. The microfluidic lighthouse: an  
25 omnidirectional gradient generator. *Lab Chip.* 2016;16: 4382–4394. doi:10.1039/c6lc00898d
- 26 59. Nakajima A, Sawai S. Dissecting Spatial and Temporal Sensing in *Dictyostelium* Chemotaxis  
27 Using a Wave Gradient Generator. *Methods Mol Biol.* New York, NY: Springer New York;  
28 2016;1407: 107–122. doi:10.1007/978-1-4939-3480-5\_8
- 29 60. Xu X, Meier-Schellersheim M, Yan J, Jin T. Locally controlled inhibitory mechanisms are

1 involved in eukaryotic GPCR-mediated chemosensing. J Cell Biol. 2007;178: 141–153.  
2 doi:10.1083/jcb.200611096

3

4 **Acknowledgments:** The authors thank S. Hirose, A. Kuspa and G. Shaulsky for providing *tgrBI*<sup>-</sup>,  
5 *tgrCI*<sup>-</sup>, GFP/*tgrBI*<sup>-</sup> and tdTomato/*tgrCI*<sup>-</sup> strains and *tgrB1/tgrC1* replacement vectors; M. Fukuzawa  
6 for pHygTm(+); R. H. Insall for PakBCRIB-RFP and HSPC300-GFP vectors; D. Knecht for GFP-  
7 Lifeact vector, V. O. Nikolaev and M. J. Lohse for Epac1-camps; Dicty Stock Center for pBig-GFP-  
8 Arp2 and pEcmAO-mRFPmars; Y. Shirokawa, M. Fujishiro and T. Sugita for technical assistance.  
9 This work was supported by MEXT KAKENHI Grant Numbers JP18H04759, JP16H01442, JSPS  
10 KAKENHI Grant Numbers JP17H0812, JP15KT0076, and in part by MEXT KAKENHI Grant  
11 Number JP17H05992, JSPS KAKENHI Grant Numbers 25710022 25103008 (to S.S.) and JSPS Grant  
12 Number JP16K18537 (to A.N.). T.F. was supported by a JSPS fellowship Grant Number  
13 JP17J08690.

14

15 **Author contributions:** T.F., A.N. and S.S. performed prototyping experiments and conceived the  
16 study. T.F. planned and carried out plasmid construction, protein purification, cell transformation,  
17 image acquisition and analysis, wrote codes for image quantification. A.N. designed and constructed  
18 microfluidics chambers. N.S. contributed to protein purification. A.N. contributed to microscopy  
19 and microfluidics setup. S.S. oversaw and supervised all aspects of the project. T.F. and S.S. wrote  
20 the manuscript.

# Fig. 1

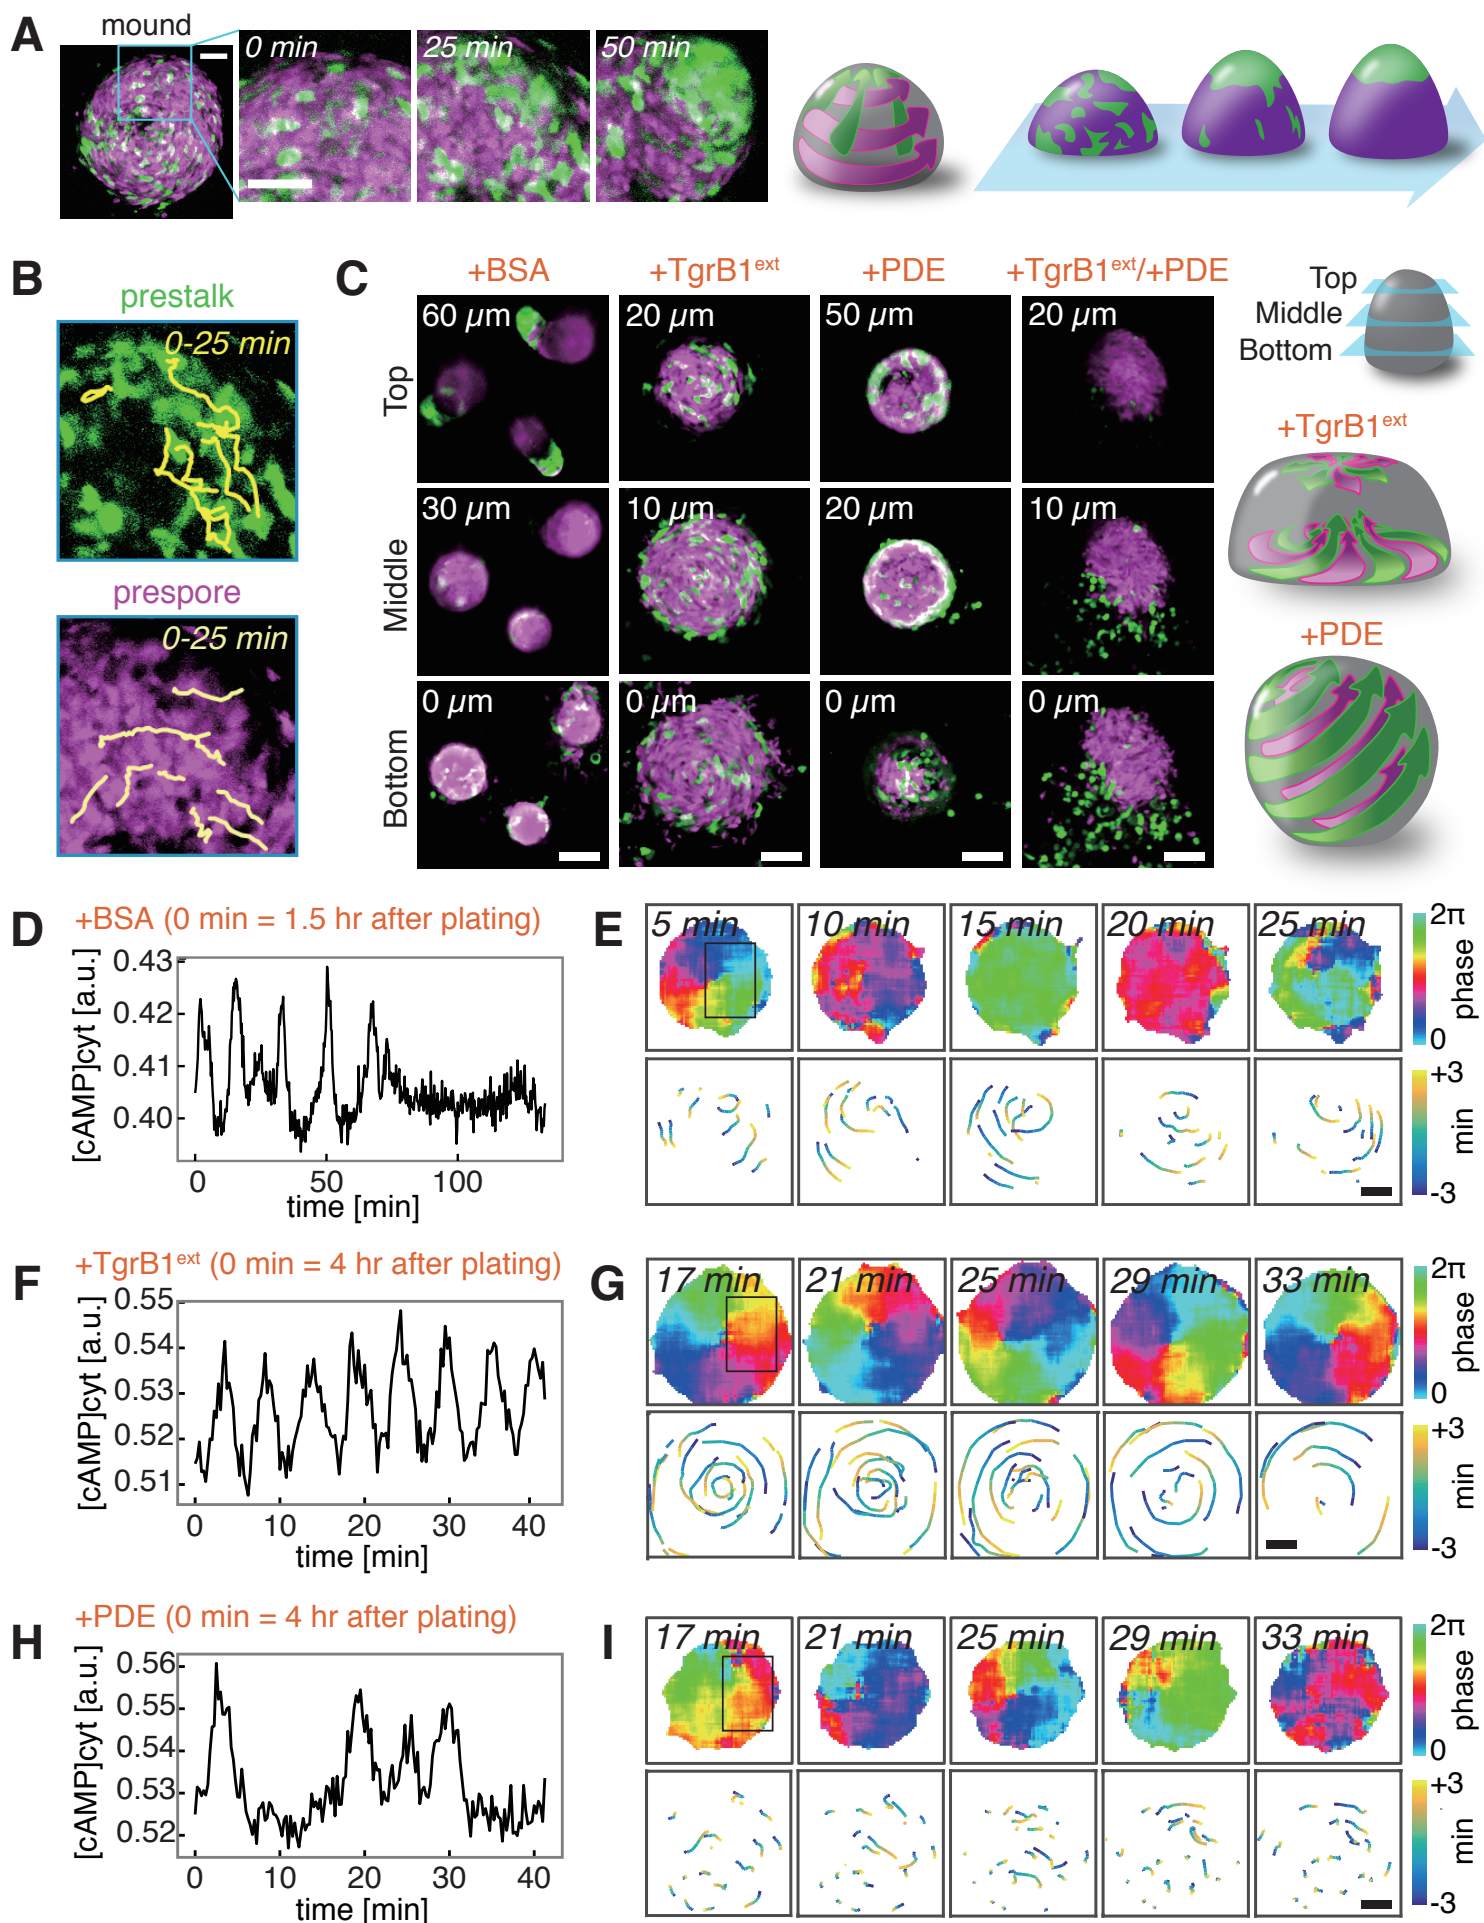

# Fig. 2

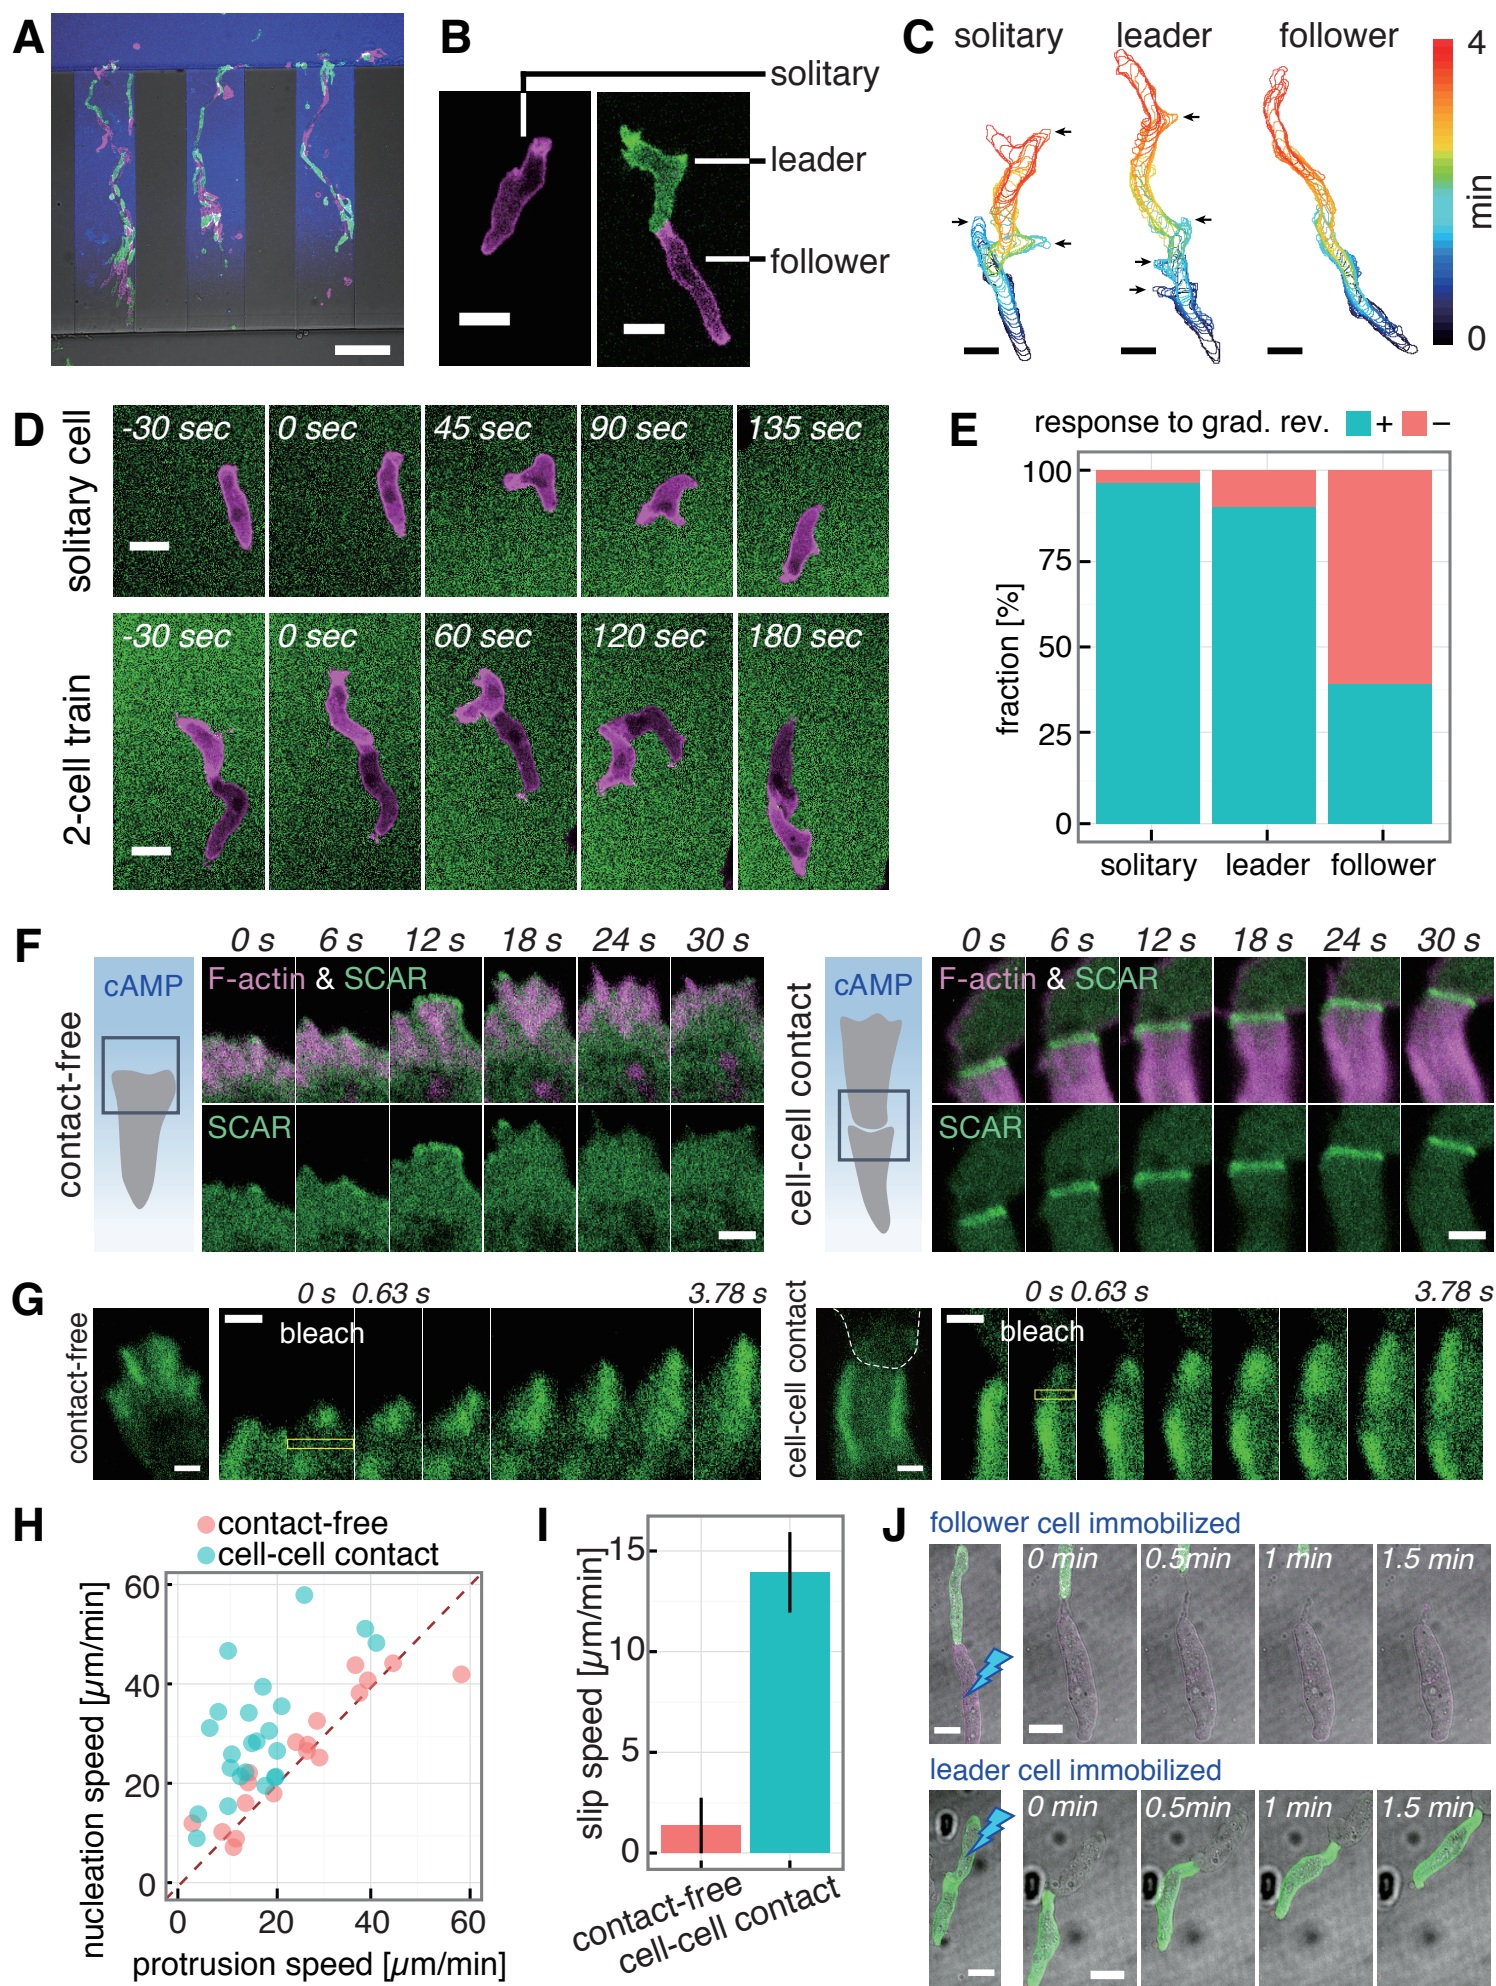

# Fig. 3

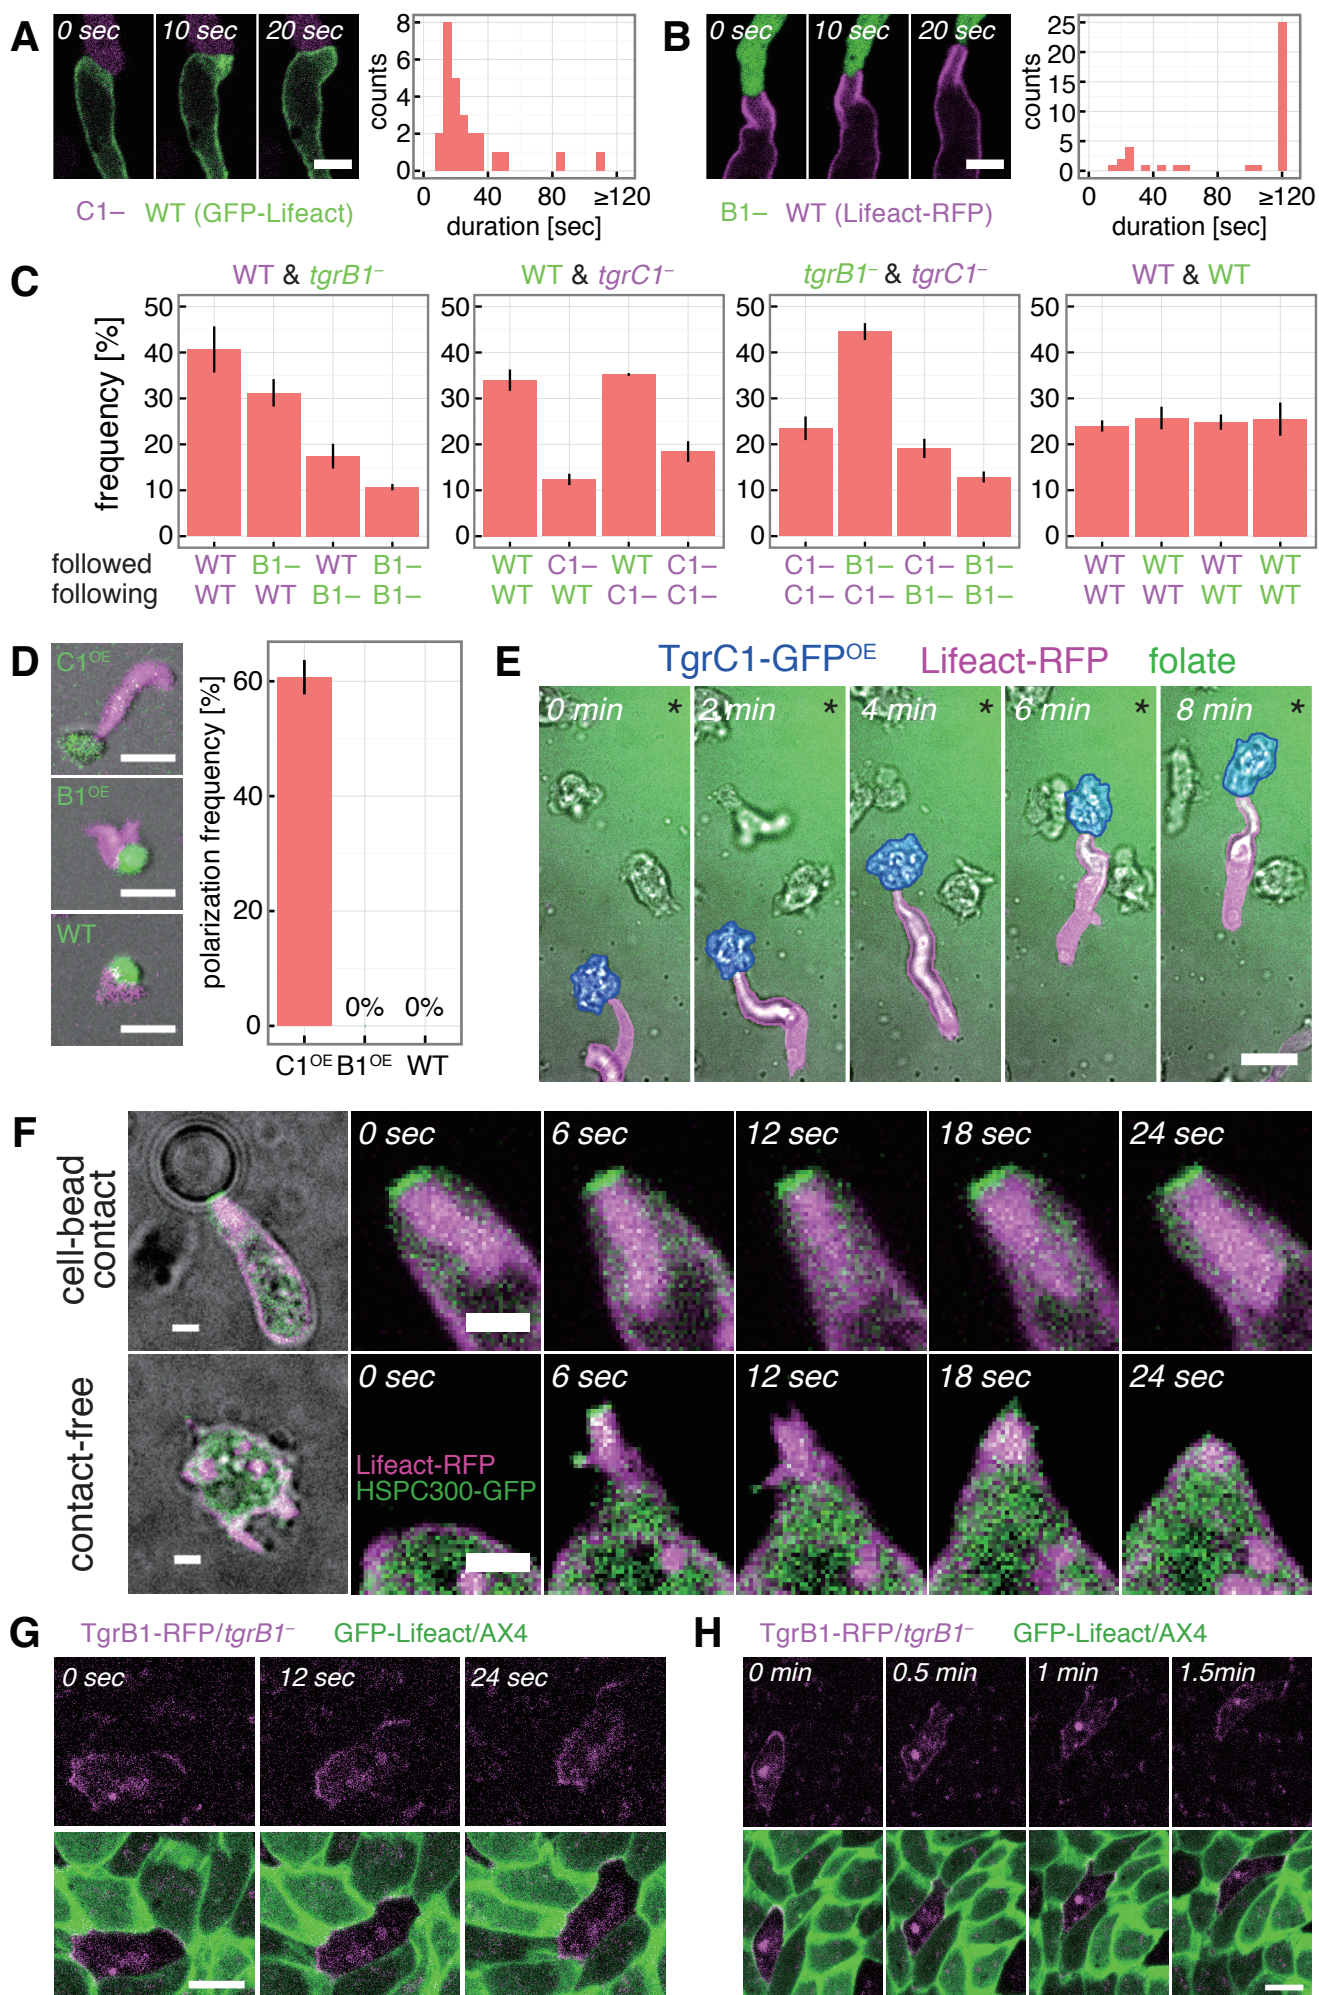

## Fig. 4

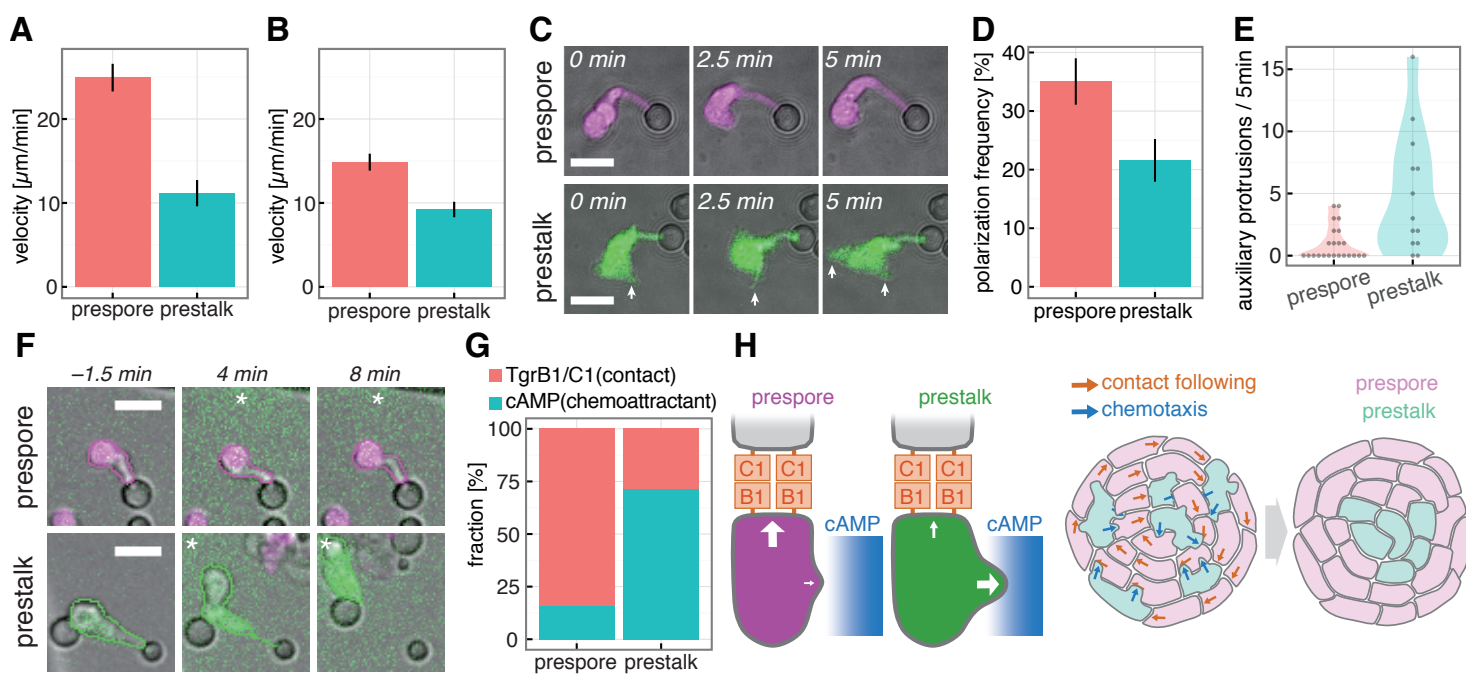

Source: http://biorxiv.org/content/10.1101/411306v1.full.pdf
